# Supplementary material for: Exit Rates of Accountable Care Organizations That Serve High Proportions of Beneficiaries of Racial and Ethnic Minority Groups
Source: PubMed Central journal article supplement (PMC9526083; doi:10.1001/jamahealthforum.2022.3398), 2022-09-30
Supplement: jamahealthforum-e223398-s001.pdf [file jamahealthforum-e223398-s001.pdf]

## Supplemental Online Content

Lin SC, Maddox KEJ, Ryan AM, Moloci N, Shay A, Hollingsworth JM. Exit rates of accountable care organizations that serve high proportions of beneficiaries of racial and ethnic minority groups. *JAMA Health Forum*. 2022;3(9):e223398. doi:10.1001/jamahealthforum.2022.3398

**eFigure.** Histogram of Percent Racial/Ethnic Minority Beneficiaries in an ACO's Entry Year (n=589)

**eTable 1.** Supplemental Analysis Systematically Dropping Years 2013-2017

**eTable 2.** Sensitivity Analysis 1, Logistic Regression Results Disaggregated by Individual Race/Ethnicity, Odds Ratios (95% CI)

**eTable 3.** Sensitivity Analysis 2, Logistic Regression Results Using RTI Race, Odds Ratios (95% CI)

**eTable 4.** Sensitivity Analysis 3, Logistic Regression Results Using Binary Variable for High Minority, Odds Ratios (95% CI)

This supplemental material has been provided by the authors to give readers additional information about their work.

**eFigure. Histogram of Percent Racial/Ethnic Minority Beneficiaries in an ACO's Entry Year (n=589)**

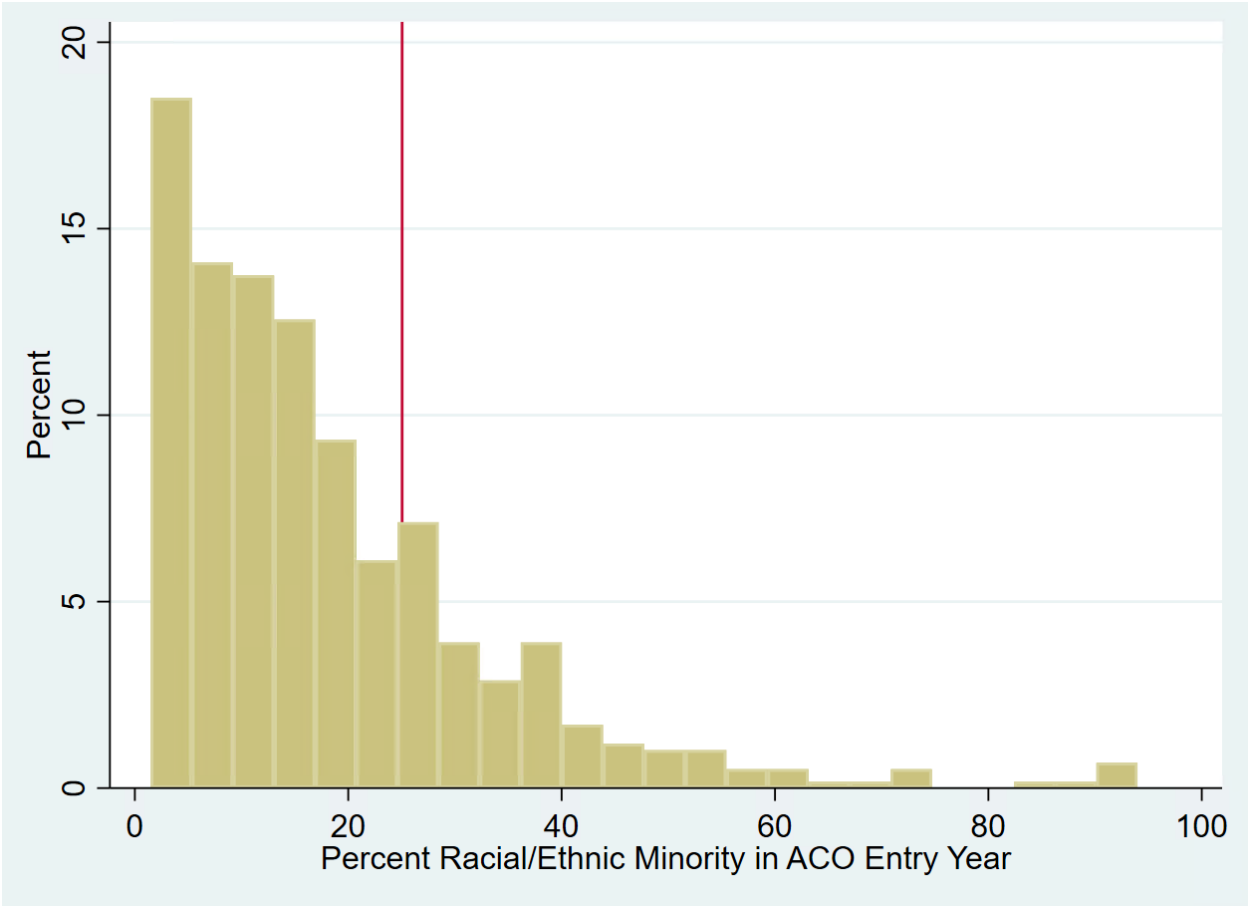

Note: Red line at 25.5% indicates the 75<sup>th</sup> percentile and the cutoff for "high minority ACOs"

**eTable 1. Supplemental Analysis Systematically Dropping Years 2013-2017**

| Percent racial/ethnic minority<br>(per 10 percentage points) | All Years<br>(Main Model) | Dropping 2013 | Dropping 2014 | Dropping 2015 | Dropping 2016 | Dropping 2017 |
|--------------------------------------------------------------|---------------------------|---------------|---------------|---------------|---------------|---------------|
|                                                              |                           |               |               |               |               |               |
| Odds ratio                                                   | 1.12*                     | 1.12*         | 1.13*         | 1.11          | 1.11          | 1.14*         |
| 95% Confidence Interval                                      | [1.00,1.25]               | [1.00,1.25]   | [1.00,1.27]   | [0.98,1.26]   | [0.98,1.26]   | [1.01,1.30]   |
| p-value                                                      | (0.045)                   | (0.052)       | (0.046)       | (0.095)       | (0.102)       | (0.041)       |
| n                                                            | 589                       | 587           | 571           | 543           | 534           | 542           |

Note: odds ratios from logistic regression results, 95% confidence intervals in brackets, \* p<0.05, \*\*p<0.01, \*\*\*p<0.001

**eTable 2. Sensitivity Analysis 1, Logistic Regression Results Disaggregated by Individual Race/Ethnicity, Odds Ratios (95% CI)**

|                                                                               | Percent Asian Beneficiaries | Percent Black Beneficiaries | Percent Hispanic Beneficiaries | Percent Native American/ Alaskan Native Beneficiaries | Percent Other Race Beneficiaries |
|-------------------------------------------------------------------------------|-----------------------------|-----------------------------|--------------------------------|-------------------------------------------------------|----------------------------------|
| <b>UNADJUSTED MODEL</b>                                                       |                             |                             |                                |                                                       |                                  |
| Percent racial/ethnic minority (per 10 percentage points)                     | 1.30 [0.99,1.72]            | 1.03 [0.87,1.21]            | 0.97 [0.57,1.65]               | 0.84 [0.02,36.57]                                     | 0.83 [0.35,1.97]                 |
| <b>ADJUSTED MODEL</b>                                                         |                             |                             |                                |                                                       |                                  |
| Percent racial/ethnic minority (per 10 percentage points)                     | 1.92* [1.05,3.53]           | 0.90 [0.69,1.19]            | 0.54 [0.17,1.74]               | 3.65 [0.03,480.15]                                    | 0.44 [0.06,3.35]                 |
| Earned Shared Savings Year Prior                                              | 0.28*** [0.14,0.56]         | 0.31*** [0.16,0.61]         | 0.30*** [0.15,0.59]            | 0.30*** [0.15,0.60]                                   | 0.31*** [0.16,0.61]              |
| <b>Beneficiary Characteristics</b>                                            |                             |                             |                                |                                                       |                                  |
| Percent disabled                                                              | 1.11*** [1.05,1.19]         | 1.09** [1.03,1.15]          | 1.08** [1.03,1.14]             | 1.08** [1.02,1.14]                                    | 1.07* [1.00,1.14]                |
| Percent dual Medicaid eligible                                                | 0.96 [0.92,1.01]            | 1 [0.97,1.03]               | 1.01 [0.97,1.04]               | 1.00 [0.97,1.03]                                      | 1.01 [0.96,1.06]                 |
| Percentile of Average HCC Risk Score for aged Non-Dual Eligible beneficiaries | 1.02** [1.01,1.03]          | 1.02** [1.01,1.03]          | 1.02** [1.00,1.03]             | 1.02** [1.01,1.03]                                    | 1.02** [1.00,1.03]               |
| <b>Organizational Characteristics</b>                                         |                             |                             |                                |                                                       |                                  |
| Cohort (Ref: 2012)                                                            |                             |                             |                                |                                                       |                                  |
| 2013                                                                          | 1.82 [0.81,4.08]            | 1.91 [0.86,4.25]            | 1.81 [0.81,4.04]               | 1.79 [0.80,3.99]                                      | 1.87 [0.84,4.14]                 |
| 2014                                                                          | 0.49 [0.22,1.09]            | 0.49 [0.22,1.08]            | 0.5 [0.23,1.09]                | 0.48 [0.22,1.05]                                      | 0.48 [0.22,1.05]                 |
| 2015                                                                          | 0.69 [0.29,1.62]            | 0.7 [0.30,1.65]             | 0.68 [0.29,1.60]               | 0.7 [0.29,1.64]                                       | 0.68 [0.29,1.62]                 |
| 2016                                                                          | 0.15*** [0.05,0.45]         | 0.14*** [0.05,0.43]         | 0.14*** [0.05,0.42]            | 0.14*** [0.05,0.43]                                   | 0.14*** [0.05,0.41]              |
| 2017                                                                          | 1.00 [1.00,1.00]            | 1.00 [1.00,1.00]            | 1.00 [1.00,1.00]               | 1.00 [1.00,1.00]                                      | 1.00 [1.00,1.00]                 |
| Number of Beneficiaries (100s)                                                | 1.01 [1.00,1.03]            | 1.01 [1.00,1.03]            | 1.01 [1.00,1.03]               | 1.01 [1.00,1.03]                                      | 1.01 [1.00,1.03]                 |
| Organizing Entity (Ref: Physician)                                            |                             |                             |                                |                                                       |                                  |
| Hospital Led                                                                  | 0.86 [0.40,1.89]            | 0.82 [0.38,1.79]            | 0.84 [0.38,1.83]               | 0.86 [0.39,1.87]                                      | 0.84 [0.39,1.83]                 |
| Both                                                                          | 0.72 [0.36,1.44]            | 0.66 [0.33,1.31]            | 0.68 [0.34,1.36]               | 0.69 [0.35,1.37]                                      | 0.67 [0.34,1.33]                 |
| Risk Model (Ref: Always Upside)                                               |                             |                             |                                |                                                       |                                  |
| Ever downside risk                                                            | 0.45 [0.17,1.16]            | 0.45 [0.18,1.17]            | 0.47 [0.18,1.22]               | 0.46 [0.18,1.18]                                      | 0.45 [0.18,1.17]                 |
| Number of Providers (100s)                                                    | 0.94* [0.90,0.99]           | 0.94* [0.89,0.99]           | 0.94* [0.90,0.99]              | 0.94* [0.89,0.99]                                     | 0.94* [0.90,0.99]                |
| % Primary Care Providers                                                      | 1.03** [1.01,1.05]          | 1.03** [1.01,1.05]          | 1.03** [1.01,1.05]             | 1.03* [1.01,1.05]                                     | 1.03* [1.00,1.05]                |
| % Advanced Practice Providers                                                 | 0.89*** [0.86,0.92]         | 0.89*** [0.86,0.92]         | 0.89*** [0.86,0.92]            | 0.89*** [0.86,0.92]                                   | 0.89*** [0.86,0.92]              |
| Percent Out-of-Network Care                                                   | 1.01 [0.99,1.03]            | 1.01 [0.99,1.03]            | 1.01 [0.99,1.03]               | 1.01 [0.99,1.03]                                      | 1 [0.98,1.03]                    |
| <b>Community Characteristics</b>                                              |                             |                             |                                |                                                       |                                  |
| Geography (Ref: Suburban)                                                     |                             |                             |                                |                                                       |                                  |
| Urban                                                                         | 0.5 [0.23,1.07]             | 0.57 [0.27,1.21]            | 0.54 [0.25,1.14]               | 0.54 [0.26,1.14]                                      | 0.57 [0.27,1.21]                 |
| Percent Dual Medicaid/Medicare Eligible                                       | 0.85 [0.67,1.06]            | 0.84 [0.67,1.06]            | 0.84 [0.67,1.05]               | 0.85 [0.68,1.06]                                      | 0.84 [0.67,1.05]                 |
| Percent Living in Poverty                                                     | 0.91 [0.82,1.02]            | 0.92 [0.82,1.03]            | 0.92 [0.82,1.02]               | 0.92 [0.83,1.03]                                      | 0.92 [0.82,1.02]                 |
| County Median Income (Dollars)                                                | 1.00* [1.00,1.00]           | 1.00* [1.00,1.00]           | 1.00* [1.00,1.00]              | 1.00* [1.00,1.00]                                     | 1.00* [1.00,1.00]                |
| Number of PCPs per 1000 Residents                                             | 2.06 [0.99,4.31]            | 2.13* [1.02,4.44]           | 2.06 [0.99,4.31]               | 2.14* [1.03,4.46]                                     | 2.16* [1.04,4.49]                |

Notes: Source: \* p<0.05, \*\*p<0.01, \*\*\*p<0.001; Hierarchical Condition Categories (HCC) score is the percentile of average HCC risk score for aged Non-Dual Eligible beneficiaries

**eTable 3. Sensitivity Analysis 2, Logistic Regression Results Using RTI Race, Odds Ratios (95% CI)**

|                                                                               | Unadjusted OR    | Adjusted for Earned Shared Savings | Adjusted for Beneficiary Characteristics | Adjusted for Organizational, and Environmental Characteristics |
|-------------------------------------------------------------------------------|------------------|------------------------------------|------------------------------------------|----------------------------------------------------------------|
| Percent Minorities (per 10 percentage points) using RTI imputed race          | 1.05 [0.95,1.17] | 1.13* [1.01,1.26]                  | 1.18 [1.00,1.39]                         | 1.15 [0.90,1.47]                                               |
| Earned Shared Savings Year Prior                                              |                  | 0.27*** [0.18,0.41]                | 0.22*** [0.15,0.34]                      | 0.16*** [0.09,0.29]                                            |
| <b>Beneficiary Characteristics</b>                                            |                  |                                    |                                          |                                                                |
| Percent disabled                                                              |                  |                                    | 1.01 [0.97,1.04]                         | 1.07** [1.02,1.13]                                             |
| Percent dual Medicaid eligible                                                |                  |                                    | 0.98 [0.96,1.01]                         | 0.99 [0.95,1.02]                                               |
| Percentile of Average HCC Risk Score for aged Non-Dual Eligible beneficiaries |                  |                                    | 1.02*** [1.02,1.03]                      | 1.02** [1.01,1.03]                                             |
| <b>Organizational Characteristics</b>                                         |                  |                                    |                                          |                                                                |
| Cohort (Ref: 2012)                                                            |                  |                                    |                                          |                                                                |
| 2013                                                                          |                  |                                    |                                          | 1.77 [0.79,3.99]                                               |
| 2014                                                                          |                  |                                    |                                          | 0.51 [0.23,1.13]                                               |
| 2015                                                                          |                  |                                    |                                          | 0.68 [0.29,1.61]                                               |
| 2016                                                                          |                  |                                    |                                          | 0.17*** [0.06,0.46]                                            |
| 2017                                                                          |                  |                                    |                                          | 0.09*** [0.03,0.28]                                            |
| Number of Beneficiaries (100s)                                                |                  |                                    |                                          | 1.01 [1.00,1.03]                                               |
| Organizing Entity (Ref: Physician)                                            |                  |                                    |                                          |                                                                |
| Hospital Led                                                                  |                  |                                    |                                          | 0.86 [0.45,1.64]                                               |
| Both                                                                          |                  |                                    |                                          | 0.87 [0.41,1.83]                                               |
| Risk Model (Ref: Always upside)                                               |                  |                                    |                                          |                                                                |
| Ever downside risk                                                            |                  |                                    |                                          | 0.88 [0.38,2.02]                                               |
| Number of Providers (100s)                                                    |                  |                                    |                                          | 0.95* [0.91,0.99]                                              |
| % Primary Care Providers                                                      |                  |                                    |                                          | 1.02* [1.00,1.04]                                              |
| % Advanced Practice Providers                                                 |                  |                                    |                                          | 0.89*** [0.86,0.92]                                            |
| Percent Out-of-Network Care                                                   |                  |                                    |                                          | 1.01 [0.99,1.03]                                               |
| <b>Environmental Characteristics</b>                                          |                  |                                    |                                          |                                                                |
| Geography (Ref: Suburban)                                                     |                  |                                    |                                          |                                                                |
| Urban                                                                         |                  |                                    |                                          | 0.67 [0.33,1.39]                                               |
| Percent Dual Medicaid/Medicare Eligible                                       |                  |                                    |                                          | 0.86 [0.69,1.07]                                               |
| Percent Living in Poverty                                                     |                  |                                    |                                          | 0.89* [0.80,0.99]                                              |
| Number of PCPs per 1000 Residents                                             |                  |                                    |                                          | 1.85 [0.90,3.81]                                               |
| County Median Income (\$1000)                                                 |                  |                                    |                                          | 0.96** [0.93,0.99]                                             |

Notes: \* p<0.05, \*\*p<0.01, \*\*\*p<0.001; Hierarchical Condition Categories (HCC) score is the percentile of average HCC risk score for aged Non-Dual Eligible beneficiaries

**eTable 4. Sensitivity Analysis 3, Logistic Regression Results Using Binary Variable for High Minority, Odds Ratios (95% CI)**

|                                                                               | Unadjusted OR    | Adjusted for Earned Shared Savings | Adjusted for Beneficiary Characteristics | Adjusted for Organizational, and Environmental Characteristics |
|-------------------------------------------------------------------------------|------------------|------------------------------------|------------------------------------------|----------------------------------------------------------------|
| High Minority (Top Quartile of Percent Minority Beneficiaries)                | 1.45 [0.97,2.17] | 1.67* [1.10,2.53]                  | 1.41 [0.88,2.25]                         | 0.97 [0.49,1.95]                                               |
| Earned Shared Savings Year Prior                                              |                  | 0.38*** [0.24,0.60]                | 0.32*** [0.20,0.52]                      | 0.27*** [0.14,0.51]                                            |
| <b>Beneficiary Characteristics</b>                                            |                  |                                    |                                          |                                                                |
| Percent disabled                                                              |                  | 1.01 [0.98,1.05]                   | 1.08** [1.02,1.13]                       | 1.01 [0.98,1.05]                                               |
| Percent dual Medicaid eligible                                                |                  | 0.99 [0.97,1.01]                   | 0.99 [0.97,1.02]                         | 0.99 [0.97,1.01]                                               |
| Percentile of Average HCC Risk Score for aged Non-Dual Eligible beneficiaries |                  | 1.02*** [1.01,1.03]                | 1.02** [1.01,1.03]                       | 1.02*** [1.01,1.03]                                            |
| <b>Organizational Characteristics</b>                                         |                  |                                    |                                          |                                                                |
| Cohort (Ref: 2012)                                                            |                  |                                    |                                          |                                                                |
| 2013                                                                          |                  |                                    |                                          | 1.89 [0.85,4.20]                                               |
| 2014                                                                          |                  |                                    |                                          | 0.56 [0.26,1.20]                                               |
| 2015                                                                          |                  |                                    |                                          | 0.76 [0.33,1.78]                                               |
| 2016                                                                          |                  |                                    |                                          | 0.20** [0.08,0.53]                                             |
| 2017                                                                          |                  |                                    |                                          | 0.14*** [0.05,0.42]                                            |
| Number of Beneficiaries (100s)                                                |                  |                                    |                                          | 1.01 [1.00,1.02]                                               |
| Organizing Entity (Ref: Physician)                                            |                  |                                    |                                          |                                                                |
| Hospital Led                                                                  |                  |                                    |                                          | 0.86 [0.46,1.61]                                               |
| Both                                                                          |                  |                                    |                                          | 0.94 [0.45,1.93]                                               |
| Risk Model (Ref: Always upside)                                               |                  |                                    |                                          |                                                                |
| Ever downside risk                                                            |                  |                                    |                                          | 0.68 [0.30,1.53]                                               |
| Number of Providers (100s)                                                    |                  |                                    |                                          | 0.95* [0.91,0.99]                                              |
| % Primary Care Providers                                                      |                  |                                    |                                          | 1.02* [1.01,1.04]                                              |
| % Advanced Practice Providers                                                 |                  |                                    |                                          | 0.89*** [0.86,0.91]                                            |
| Percent Out-of-Network Care                                                   |                  |                                    |                                          | 1.01 [0.99,1.03]                                               |
| <b>Community Characteristics</b>                                              |                  |                                    |                                          |                                                                |
| Geography (Ref: Suburban)                                                     |                  |                                    |                                          |                                                                |
| Urban                                                                         |                  |                                    |                                          | 0.6 [0.30,1.18]                                                |
| Percent Dual Medicaid/Medicare Eligible                                       |                  |                                    |                                          | 0.87 [0.71,1.07]                                               |
| Percent Living in Poverty                                                     |                  |                                    |                                          | 0.92 [0.83,1.01]                                               |
| Number of PCPs per 1000 Residents                                             |                  |                                    |                                          | 1.81 [0.92,3.59]                                               |
| County Median Income (Dollars)                                                |                  |                                    |                                          | 0.96* [0.94,0.99]                                              |
| N                                                                             | 589              |                                    |                                          |                                                                |

Notes: \* p<0.05, \*\*p<0.01, \*\*\*p<0.001; Hierarchical Condition Categories (HCC) score is the percentile of average HCC risk score for aged Non-Dual Eligible beneficiaries
